# Supplementary material for: Relationship Among Diabetes Distress, Decisional Conflict, Quality of Life, and Patient Perception of Chronic Illness Care in a Cohort of Patients With Type 2 Diabetes and Other Comorbidities
Source: Oxford University Press journal article supplement (doi:10.2337/dc18-1256), 2019-05-02
Supplement: dc181256supplementarydata.pdf [file dc181256supplementarydata.pdf]

## SUPPLEMENTARY DATA

### Rationale for Supplementary Materials

Supplementary Table S1 – The STROBE Checklist was included to provide the reporting guidelines we used for a cross-sectional study.

Supplementary Table S2 – We included the complete list of the possible comorbidities included in recruitment selection of the study.

Supplementary Table S3 – We included the table for the additional adjusted analyses that were requested, which include adjustments for ethnicity, duration of diabetes, employment, and family support.

## SUPPLEMENTARY DATA

### Supplementary Table 1. Strobe Checklist for Cross-Sectional Design

STROBE Statement—Checklist of items that should be included in reports of *cross-sectional studies*

|                              | Item No | Recommendation                                                                                                                                                                                                                                                                                                                             |
|------------------------------|---------|--------------------------------------------------------------------------------------------------------------------------------------------------------------------------------------------------------------------------------------------------------------------------------------------------------------------------------------------|
| <b>Title and abstract</b>    | 1       | (a) Indicate the study's design with a commonly used term in the title or the abstract<br>(b) Provide in the abstract an informative and balanced summary of what was done and what was found                                                                                                                                              |
| <b>Introduction</b>          |         |                                                                                                                                                                                                                                                                                                                                            |
| Background/rationale         | 2       | Explain the scientific background and rationale for the investigation being reported                                                                                                                                                                                                                                                       |
| Objectives                   | 3       | State specific objectives, including any prespecified hypotheses                                                                                                                                                                                                                                                                           |
| <b>Methods</b>               |         |                                                                                                                                                                                                                                                                                                                                            |
| Study design                 | 4       | Present key elements of study design early in the paper                                                                                                                                                                                                                                                                                    |
| Setting                      | 5       | Describe the setting, locations, and relevant dates, including periods of recruitment, exposure, follow-up, and data collection                                                                                                                                                                                                            |
| Participants                 | 6       | (a) Give the eligibility criteria, and the sources and methods of selection of participants                                                                                                                                                                                                                                                |
| Variables                    | 7       | Clearly define all outcomes, exposures, predictors, potential confounders, and effect modifiers. Give diagnostic criteria, if applicable                                                                                                                                                                                                   |
| Data sources/<br>measurement | 8*      | For each variable of interest, give sources of data and details of methods of assessment (measurement). Describe comparability of assessment methods if there is more than one group                                                                                                                                                       |
| Bias                         | 9       | Describe any efforts to address potential sources of bias                                                                                                                                                                                                                                                                                  |
| Study size                   | 10      | Explain how the study size was arrived at                                                                                                                                                                                                                                                                                                  |
| Quantitative variables       | 11      | Explain how quantitative variables were handled in the analyses. If applicable, describe which groupings were chosen and why                                                                                                                                                                                                               |
| Statistical methods          | 12      | (a) Describe all statistical methods, including those used to control for confounding<br>(b) Describe any methods used to examine subgroups and interactions<br>(c) Explain how missing data were addressed<br>(d) If applicable, describe analytical methods taking account of sampling strategy<br>(e) Describe any sensitivity analyses |
| <b>Results</b>               |         |                                                                                                                                                                                                                                                                                                                                            |
| Participants                 | 13*     | (a) Report numbers of individuals at each stage of study—eg numbers potentially eligible, examined for eligibility, confirmed eligible, included in the study, completing follow-up, and analysed<br>(b) Give reasons for non-participation at each stage<br>(c) Consider use of a flow diagram                                            |
| Descriptive data             | 14*     | (a) Give characteristics of study participants (eg demographic, clinical, social) and information on exposures and potential confounders                                                                                                                                                                                                   |

## SUPPLEMENTARY DATA

|                          |     |                                                                                                                                                                                                                 |
|--------------------------|-----|-----------------------------------------------------------------------------------------------------------------------------------------------------------------------------------------------------------------|
|                          |     | (b) Indicate number of participants with missing data for each variable of interest                                                                                                                             |
| Outcome data             | 15* | Report numbers of outcome events or summary measures                                                                                                                                                            |
| Main results             | 16  | (a) Give unadjusted estimates and, if applicable, confounder-adjusted estimates and their precision (eg, 95% confidence interval).<br>Make clear which confounders were adjusted for and why they were included |
|                          |     | (b) Report category boundaries when continuous variables were categorized                                                                                                                                       |
|                          |     | (c) If relevant, consider translating estimates of relative risk into absolute risk for a meaningful time period                                                                                                |
| Other analyses           | 17  | Report other analyses done—eg analyses of subgroups and interactions, and sensitivity analyses                                                                                                                  |
| <b>Discussion</b>        |     |                                                                                                                                                                                                                 |
| Key results              | 18  | Summarise key results with reference to study objectives                                                                                                                                                        |
| Limitations              | 19  | Discuss limitations of the study, taking into account sources of potential bias or imprecision. Discuss both direction and magnitude of any potential bias                                                      |
| Interpretation           | 20  | Give a cautious overall interpretation of results considering objectives, limitations, multiplicity of analyses, results from similar studies, and other relevant evidence                                      |
| Generalisability         | 21  | Discuss the generalisability (external validity) of the study results                                                                                                                                           |
| <b>Other information</b> |     |                                                                                                                                                                                                                 |
| Funding                  | 22  | Give the source of funding and the role of the funders for the present study and, if applicable, for the original study on which the present article is based                                                   |

## SUPPLEMENTARY DATA

**Supplementary Table 2.** List of Comorbidities Included in Recruitment Selection

|                                                                                          |
|------------------------------------------------------------------------------------------|
| Comorbidities in Addition to Type 1 or 2 Diabetes                                        |
| Heart disease (including ischemic, valvular, congestive, arrhythmic, congenital disease) |
| Heart failure                                                                            |
| Stroke                                                                                   |
| Mental health disorders (stress, anxiety, depression, multiple depressive disorders)     |
| Cancer (excludes nonmelanoma skin cancer)                                                |
| Respiratory (asthma, chronic bronchitis, COPD)                                           |
| Musculoskeletal (arthritis, osteoporosis)                                                |
| Kidney disease                                                                           |
| Eye disease                                                                              |
| Nerve damage                                                                             |

## SUPPLEMENTARY DATA

### **Supplementary Table 3.** Additional Adjusted Analyses

Adjusted  $\beta$ -values of the selected associations between DDS and SF-12, PACIC and DCS and DCS and DDS with their respective selected sub-scores.

| Scale Comparisons                                                     | $\beta$ -value, CI (P-value)                 |
|-----------------------------------------------------------------------|----------------------------------------------|
| SF-12 and DDS - emotional burden sub-score                            | -3.635, CI: -5.75 to -1.50<br>(P= 0.0010)    |
| SF-12 mental component sub-score and DDS - emotional burden sub-score | -3.34, CI: -4.91 to -1.77<br>(P<0.0001)      |
| PACIC and DCS                                                         | -6.7, CI: -9.1 to -4.32<br>(P<0.0001)        |
| PACIC - patient activation sub-score and DCS                          | -4.305, CI: -6.25 to -2.375<br>(P<0.0001)    |
| DCS and DDS (total scores)                                            | 0.0139, CI: 0.00372 to 0.0024<br>(P=0.0078)  |
| DCS -uncertainty sub-score and DDS -emotional burden sub-score        | 0.00435, CI: -0.0066 to 0.0153<br>(P=0.4330) |

$\beta$  Values were adjusted for age, education, income, ethnicity, duration of diabetes, employment, and family support.
